# Supplementary material for: Understanding summertime H 2 O 2 chemistry in North China Plain through observations and modelling studies
Source: Copernicus journal article supplement (doi:10.5194/egusphere-2025-795), 2025-03-25
Supplement: Supplementary file [file egusphere-2025-795-AC1-supplement.pdf]

We thank the reviewer for their careful reading of our manuscript and for providing these constructive, specific comments. Below, we respond to each comment point-by-point. Comments by the reviewer are given in black normal font, and our response to the comments is shown in blue. Newly added and modified text in the revised manuscript and supporting information (SI) is given in italics.

**Comment:** Section 3.3: The analysis of  $O_3/H_2O_2$  ratio differences between clean and polluted days provides an interesting preliminary assessment, but the authors should acknowledge potential confounding factors like VOC/NO<sub>x</sub> ratios that might influence this relationship.

**Response:** Thank you for this insightful comment. We agree that the analysis of the  $O_3/H_2O_2$  ratio difference between clean and polluted days is a preliminary assessment and that other factors, such as variations in VOC/NO<sub>x</sub> ratios, could indeed influence this relationship alongside particle uptake effects. We will revise the text in Section 3.3 to explicitly acknowledge these potential confounding factors and state that while the observed difference supports the hypothesis of particle uptake, variations in photochemical regimes (influenced by VOC/NO<sub>x</sub>) could also contribute.

We have added the following texts:

*Line 300-304: “In addition, differences, potentially driven by varying VOC/NO<sub>x</sub> ratios between clean and polluted days, could also influence the  $O_3/H_2O_2$  relationship independently of particle uptake effects.”*

**Comment:** While the study effectively demonstrates the need for particle uptake, the sensitivity to the HO<sub>2</sub> uptake coefficient (discussed in lines 304-309) is important. The manuscript correctly notes that this influences the derived H<sub>2</sub>O<sub>2</sub> uptake coefficient. Perhaps briefly reiterate this uncertainty in the conclusion when stating the H<sub>2</sub>O<sub>2</sub> uptake coefficient.

**Response:** We agree that reiterating the potential influence of the HO<sub>2</sub> uptake uncertainty on the derived H<sub>2</sub>O<sub>2</sub> uptake coefficient in the conclusion is valuable. We will add a sentence to the abstract to briefly restate this caveat.

We have added the following texts:

*Line 18-20: “A box model with default gas-phase chemistry overestimated H<sub>2</sub>O<sub>2</sub> by a factor of 2.7, and including particle uptake of H<sub>2</sub>O<sub>2</sub> (uptake coefficient:  $6 \times 10^{-4}$ ) improved agreement with observations, although we note this value carries some uncertainty related to the assumed HO<sub>2</sub> uptake coefficient.”*

**Comment:** The text acknowledges the underestimation of organic peroxides (lines 125-126, 244-245). While H<sub>2</sub>O<sub>2</sub> is shown to dominate, briefly stating why the method underestimates organic peroxides (e.g., lower collection efficiency for some species) could add clarity for readers unfamiliar with the technique.

**Response:** Thank you for pointing out the need for clarification. We have expanded our explanation of why the measurement method underestimates organic peroxides in Section 2.2:

*Line 126-133: “However, it is important to note that the percentage of organic peroxides reported in this study represents a lower limit, as the collection efficiency of the stripping coil technique varies significantly among different organic peroxide species. While  $\text{H}_2\text{O}_2$  is efficiently trapped due to its high solubility (Henry’s law constant:  $\sim 10^5 \text{ M atm}^{-1}$ ), many organic peroxides such as methyl hydroperoxide (MHP) have substantially lower solubilities (Henry’s law constant:  $\sim 3 \times 10^2 \text{ M atm}^{-1}$ ), resulting in lower collection efficiencies. Additionally, the catalase used to differentiate between  $\text{H}_2\text{O}_2$  and organic peroxides may not completely discriminate between certain hydroperoxide species, further contributing to uncertainty in organic peroxide quantification.”*

**Comment:** There seems to be a minor discrepancy in the stated contribution of particle uptake to  $\text{H}_2\text{O}_2$  loss (69% in Abstract/Conclusions vs. 64% implied by Fig S2 caption/text line 320). Please ensure consistency.

**Response:** We thank the reviewer for catching this inconsistency. We have verified our calculations and the contribution of particle uptake is indeed 69%. We will correct the value mentioned around line 320 (currently 64%) and ensure consistency in the Abstract and Conclusion.

**Comment:** Line 192-196: The manuscript highlights an increasing trend in  $\text{H}_2\text{O}_2$  concentrations over time in the North China Plain. While comparisons with previous studies are provided, the discussion on potential drivers of this trend (e.g., changes in  $\text{NO}_x/\text{VOC}$  ratios due to emission policies) is limited. The authors should expand on this.

**Response:** This is a very relevant point. We revised the text in Section 3.1 to include a brief discussion on potential drivers.

*Line 201-205: “The significant reduction in  $\text{NO}_x$  emissions in the North China Plain over recent years, while VOC levels remained relatively high or decreased less sharply, has likely shifted the atmospheric chemistry towards conditions more favorable for  $\text{HO}_2$  recombination, potentially contributing to the observed increasing trend in  $\text{H}_2\text{O}_2$  concentrations. This aligns with the known sensitivity of  $\text{H}_2\text{O}_2$  formation to  $\text{NO}_x$  levels.”*

**Comment:** Line 407: The conclusions summarize the key findings well but could include a forward-looking statement on future research needs (e.g., long-term  $\text{H}_2\text{O}_2$  monitoring, improved  $\text{HO}_2$  uptake parameterization) to guide subsequent studies.

**Response:** Thank you for the suggestion. We added some text at the end of the Conclusion outlining future research needs:

*Line 457-462: “Future research should focus on long-term H<sub>2</sub>O<sub>2</sub> monitoring across different environments in the region, refining the parameterization of heterogeneous uptake processes (particularly for HO<sub>2</sub> and H<sub>2</sub>O<sub>2</sub> under varying aerosol compositions), and investigating the impacts of changing VOC/NO<sub>x</sub> ratios on H<sub>2</sub>O<sub>2</sub> chemistry. In addition, further research on the interactions between gas-phase oxidants and aerosol processes will be vital for understanding the complex feedback mechanisms that influence air quality in rural and urban environments.”*
